# Supplementary material for: Andrological Dysfunction Signals Increased Cardiometabolic Risk: An Age Stratified, Propensity-Matched Cohort Study
Source: Research Square preprint supplement (doi:10.21203/rs.3.rs-7730800/v1), 2025-10-16
Supplement: Supplementary file 1 [file 6dd818bb4408a43fd06bd4a3.xlsx]

## Sheet: Sheet1
Table 3: Erectile dysfunction cohort demographics and comorbidities
Demographics		Mean ± SD	Patients	% of Cohort	P-Value	Std diff.
Control	Current Age	56.8 +/- 10.6	979 238	1	0.99	<0.001
ED		56.8 +/- 10.6	979 238	1
Control	Age at Index	51.0 +/- 11.3	979 238	1	<0.01	0.027
ED		50.7 +/- 10.8	979 238	1
Control	White		666 235	0.68	0.99	<0.001
ED			666 230	0.68
Control	Hispanic or Latino		74 865	0.076	0.98	<0.001
ED			74 874	0.076
Control	Black or African American		168 914	0.172	0.99	<0.001
ED			168 920	0.173
Control	Asian		25 306	0.026	1	<0.001
ED			25 306	0.026
Comorbidities			Patients	% of Cohort	P-Value	Std diff.
Control	Tobacco use		38 870	0.04	0.98	<0.001
ED			38 876	0.04
Control	Alcohol related disorders		47 519	0.049	0.99	<0.001
ED			47 524	0.049
Control	Disorders of lipoprotein metabolism and other lipidemias		256 507	0.262	<0.01	0.191
ED			342 122	0.349
Control	Overweight		10 942	0.011	<0.01	0.063
ED			18 444	0.019
