# Supplementary material for: Andrological Dysfunction Signals Increased Cardiometabolic Risk: An Age Stratified, Propensity-Matched Cohort Study
Source: Research Square preprint supplement (doi:10.21203/rs.3.rs-7730800/v1), 2025-10-16
Supplement: Supplementary file 2 [file e1d17d9e10772a4c64d0275d.xlsx]

## Sheet: Sheet1
Table 1. Low testosterone cohort demographics and comorbidities
Demographics		Mean ± SD	Patients	% of Cohort	P-Value	Std diff.
Control	Current Age	53.0 +/- 11.8	363 109	1	0.99	<0.001
Low T		53.0 +/- 11.8	363 109	1
Control	Age at Index	47.2 +/- 12.4	363 109	1	<0.01	0.067
Low T		46.4 +/- 11.7	363 109	1
Control	White		276 353	0.761	1	<0.001
Low T			276 353	0.761
Control	Hispanic or Latino		23 927	0.066	0.99	<0.001
Low T			23 928	0.066
Control	Black or African American		30 569	0.084	1	<0.001
Low T			30 569	0.084
Control	Asian		8 771	0.024	1	<0.001
Low T			8 771	0.024
Comorbidities			Patients	% of Cohort	P-Value	Std diff.
Control	Tobacco use		8 052	0.022	0.99	<0.001
Low T			8 053	0.022
Control	Alcohol related disorders		10 460	0.029	0.99	<0.001
Low T			10 459	0.029
Control	Disorders of lipoprotein metabolism and other lipidemias		88 306	0.243	<0.01	0.092
Low T			102 950	0.284
Control	Overweight		4 519	0.012	<0.01	0.02
Low T			5 359	0.015
