# Supplementary material for: Andrological Dysfunction Signals Increased Cardiometabolic Risk: An Age Stratified, Propensity-Matched Cohort Study
Source: Research Square preprint supplement (doi:10.21203/rs.3.rs-7730800/v1), 2025-10-16
Supplement: Supplementary file 3 [file f9218db7f39aa4cd391dc74b.xlsx]

## Sheet: Sheet1
Table 2: Testosterone replacement therapy subgroup analysis
Demographics		Mean ± SD	Patients	% of Cohort	P-Value	Std diff.
TRT	Current Age	55.6 +/- 10.8	17 479	1	0.99	<0.001
No TRT		55.6 +/- 10.8	17 479	1
TRT	Age at Index	49.9 +/- 10.9	17 479	1	<0.01	0.064
No TRT		49.2 +/- 11.0	17 479	1
TRT	White		14 336	0.82	0.98	<0.001
No TRT			14 338	0.82
TRT	Hispanic or Latino		877	0.05	0.98	<0.001
No TRT			876	0.05
TRT	Black or African American		994	0.057	1	<0.001
No TRT			994	0.057
TRT	Asian		321	0.018	1	<0.001
No TRT			321	0.018
Comorbidities			Patients	% of Cohort	P-Value	Std diff.
TRT	Tobacco use		388	0.022	0.86	0.002
No TRT			383	0.022
TRT	Alcohol related disorders		525	0.03	0.95	0.001
No TRT			523	0.03
TRT	Disorders of lipoprotein metabolism and other lipidemias		7 029	0.402	<0.01	0.204
No TRT			5 333	0.305
TRT	Overweight		299	0.017	0.65	0.005
No TRT			288	0.016
